# Supplementary material for: Characterization of miRNAs in Milk Small Extracellular Vesicles from Enzootic Bovine Leukosis Cattle
Source: MDPI journal article supplement (doi:10.3390/ijms231810782), 2022-09-15
Supplement: s1 [file s1]

**Table S1. miRNA sequence**

| miRNA※1        | Sequence※2             | Active sequence in microarray probe※3 |
|----------------|------------------------|---------------------------------------|
| bta-miR-1246   | AAUGGAUUUUUGGAGCAGG    | CCTGCTCCAAAAATCC                      |
| hsa-miR-424-5p | CAGCAGCAAUUCAUGUUUUGAA | TTCAAAACATGAATTGCTGCTG                |
| bta-miR-424-5p | CAGCAGCAAUUCAUGUUUUGA  | TCAAAACATGAATTGCTGC                   |
| hsa-miR-1290   | UGGAUUUUUGGAUCAGGGA    | TCCCTGATCCAAAAATCC                    |
| bta-miR-1290   | Unidentified           | Not contained                         |

※1 qPCR for bta-miR-1246, hsa-miR-424-5p, and hsa-miR-1290 were conducted using primers contained in miRCURY LNA miRNA PCR assay (339306, Qiagen), YP00205630, YP00204736, and YP02118634, respectively.

※2 Sequence information of mature miRNAs was obtained from miRBase (<http://www.mirbase.org/>) (accessed on 7 October, 2021).

※3 An active sequence was contained in the custom array slide (G4871A-#085798, Agilent) used in this study.

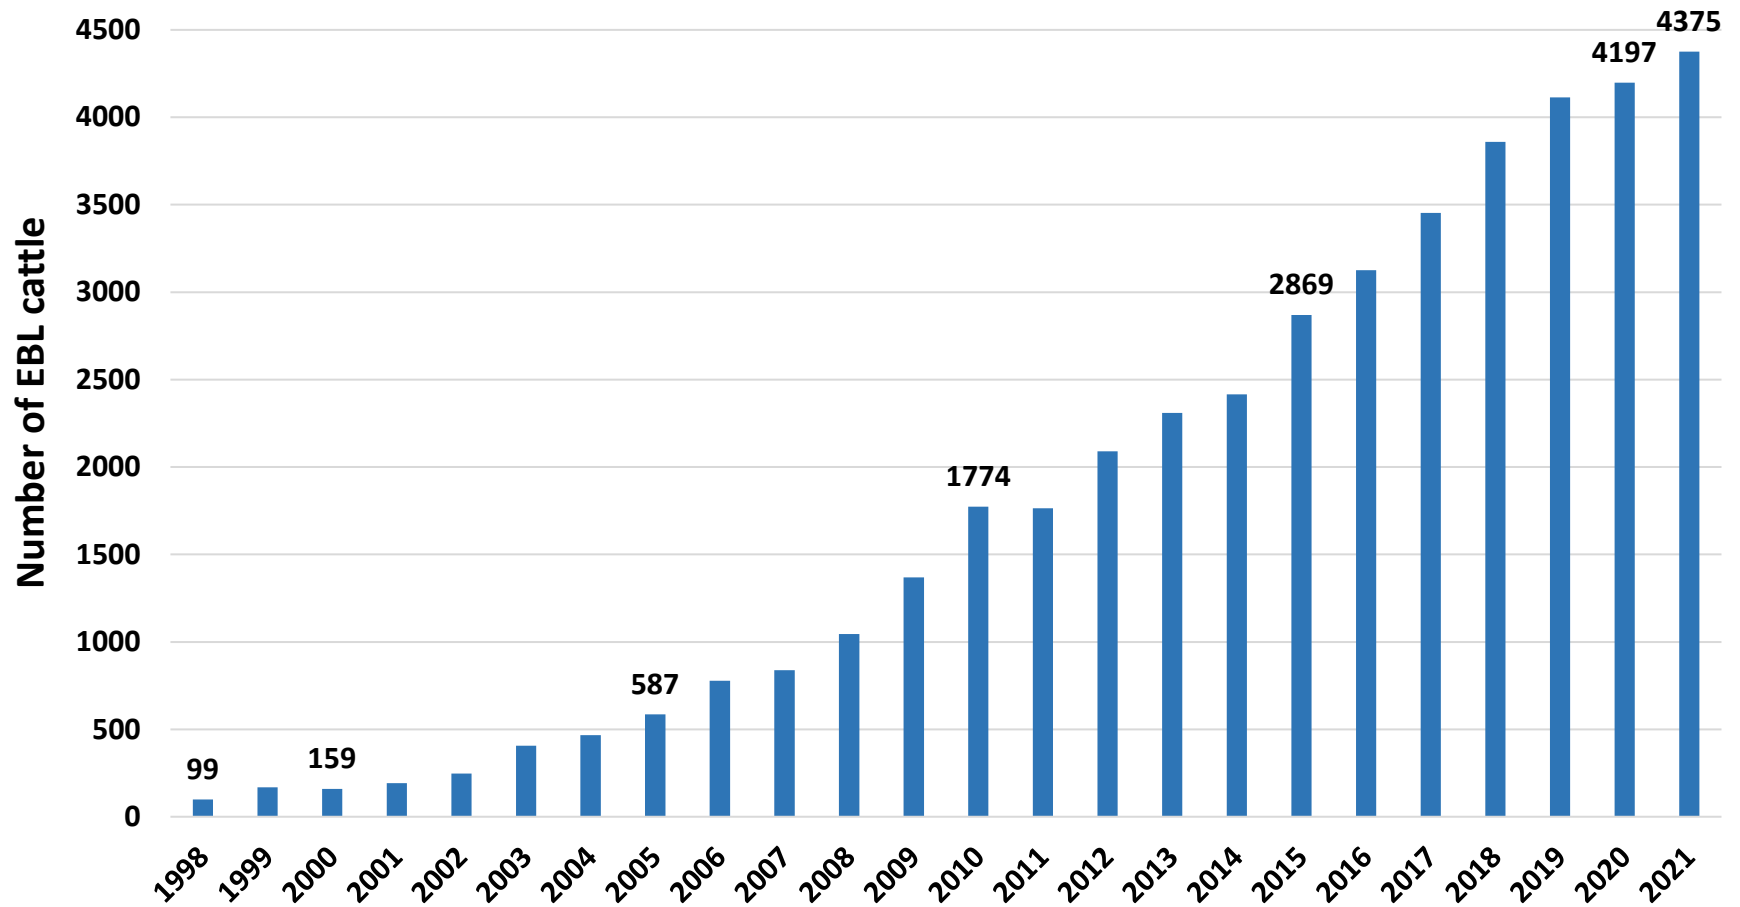

**Figure S1. Number of enzootic bovine leukosis (EBL) cattle in Japan.**

Data from the Surveillance of Infectious Diseases, the Ministry of Agriculture, Forestry and Fisheries, Japan. (in Japanese)  
Accessed 20 July, 2022. [https://www.maff.go.jp/j/syouan/douei/kansi\\_densen/kansi\\_densen.html](https://www.maff.go.jp/j/syouan/douei/kansi_densen/kansi_densen.html).

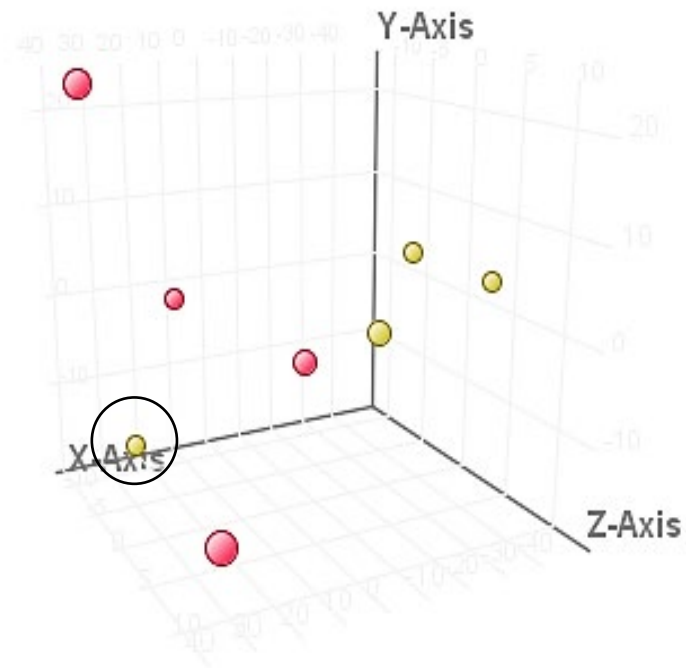

**Figure S2. Principal component analysis (PCA) of miRNA amount of uninfected cattle (yellow dots) and enzootic bovine leukosis (EBL) cattle (red dots) based on microarray analysis.**

The black circle shows the uninfected cow (cow no. 2 in Table 1) that was different from the other uninfected cattle.

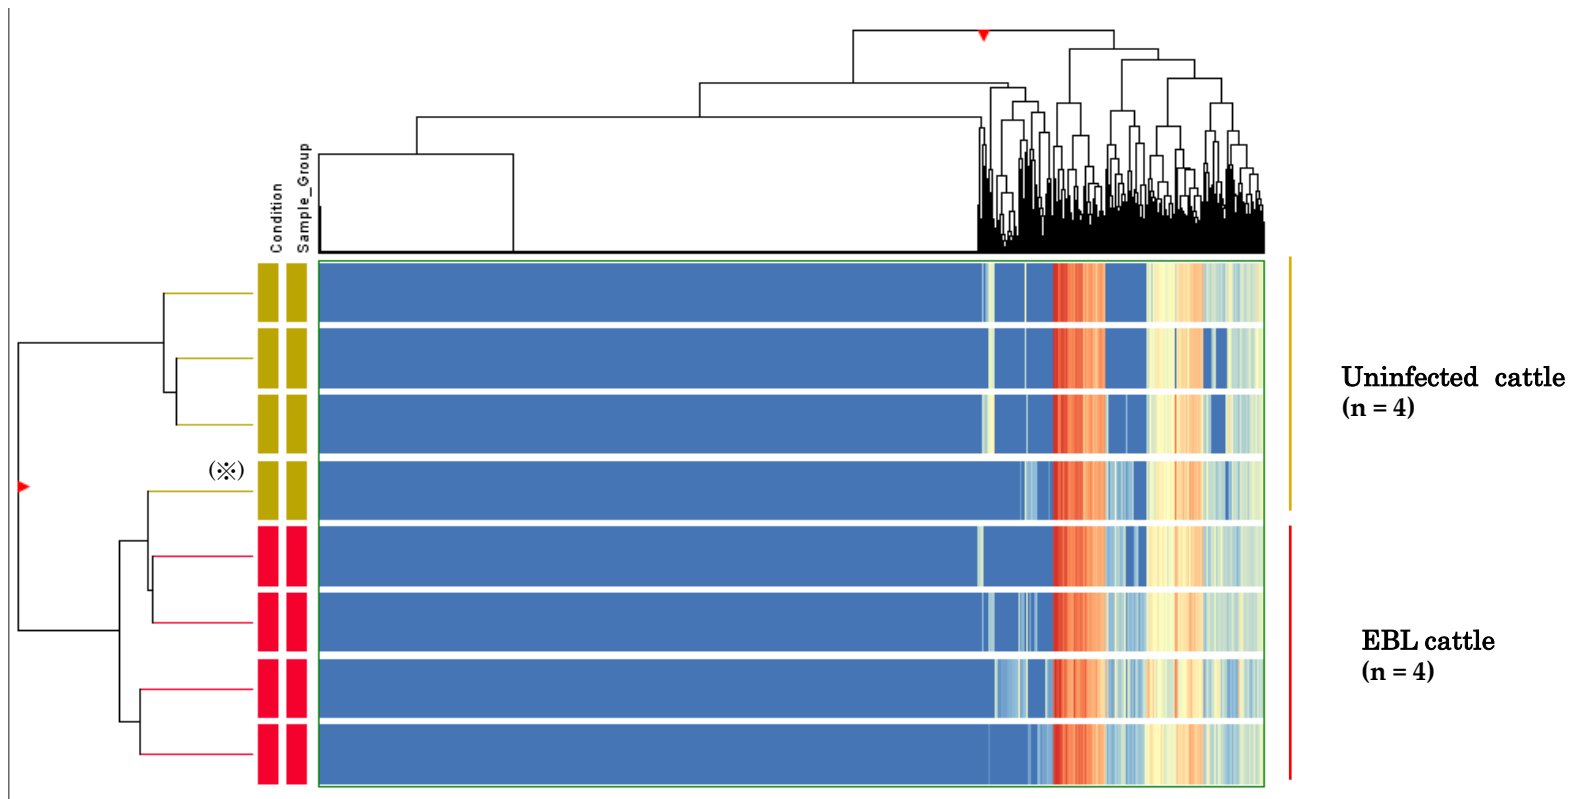

**Figure S3. Cluster analysis of miRNA amount of uninfected and enzootic bovine leukosis (EBL) cattle based on microarray analysis.**

One of the uninfected cattle (\*) (cow no. 2 in Table 1) was classified into different cluster from the other uninfected cattle.

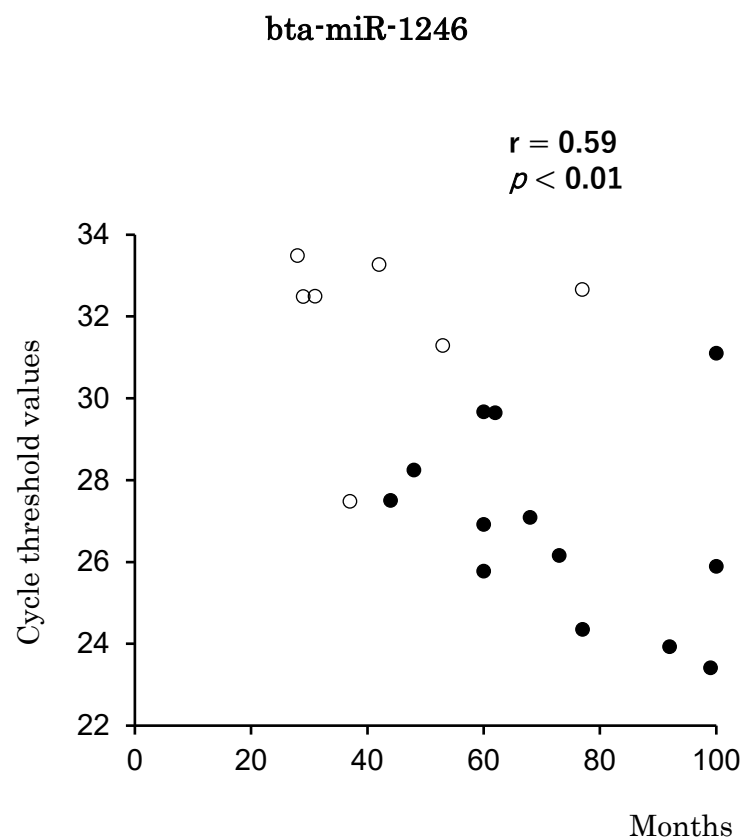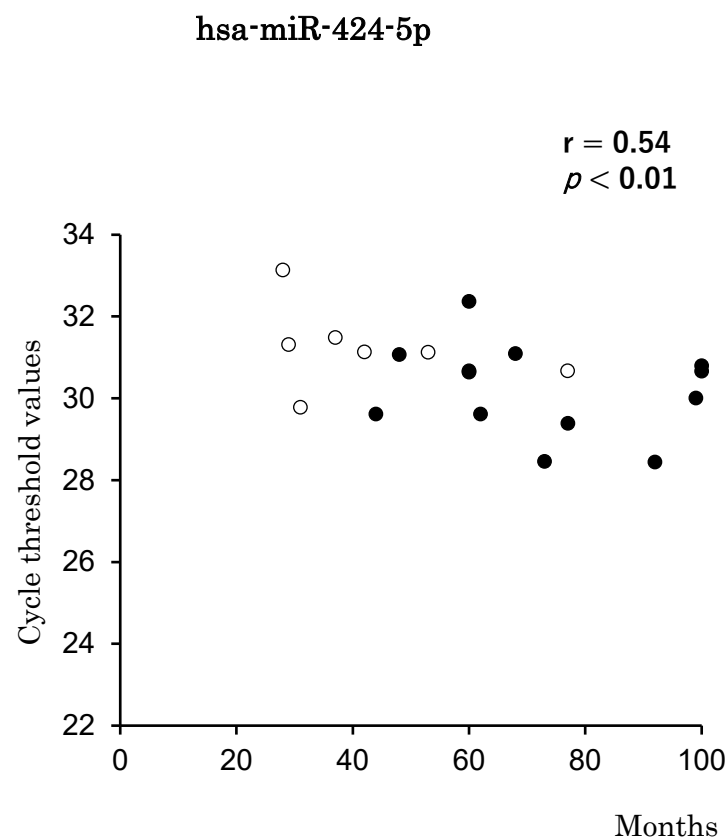

**Figure S4. Correlation between age and cycle threshold values of miRNAs for biomarker candidates using milk small extracellular vesicles.** The correlation between two continuous variables was determined using Spearman's bivariate correlation analysis.

○ Uninfected cattle (n = 7)

● EBL cattle (n = 13)

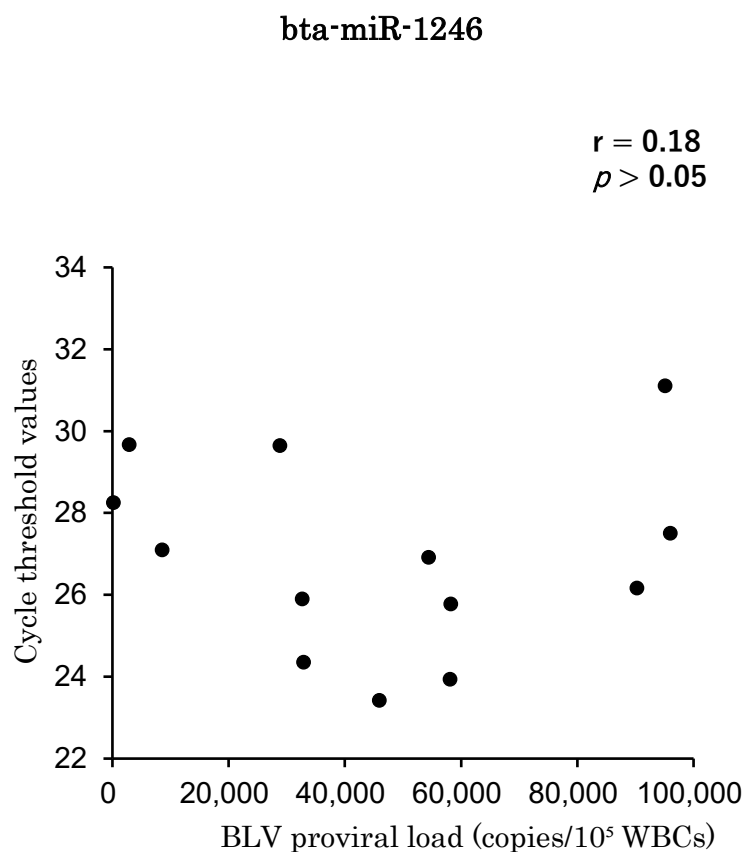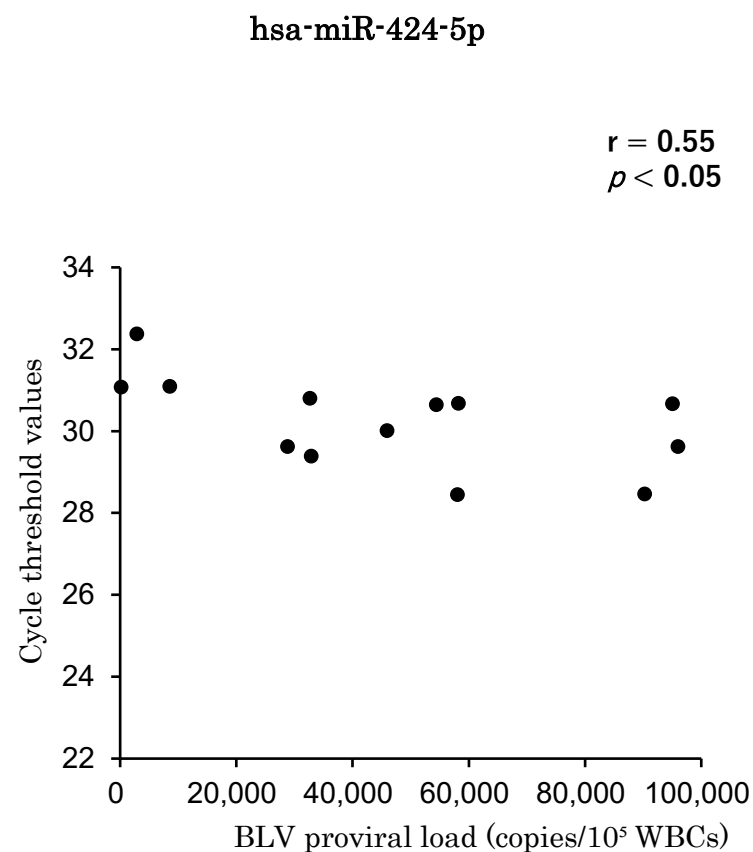

**Figure S5. Correlation between **bovine leukemia virus (BLV) proviral load** and cycle threshold values of miRNAs for biomarker candidates using milk small extracellular vesicles.** The correlation between two continuous variables was determined using Spearman's bivariate correlation analysis.

● EBL cattle (n = 13)

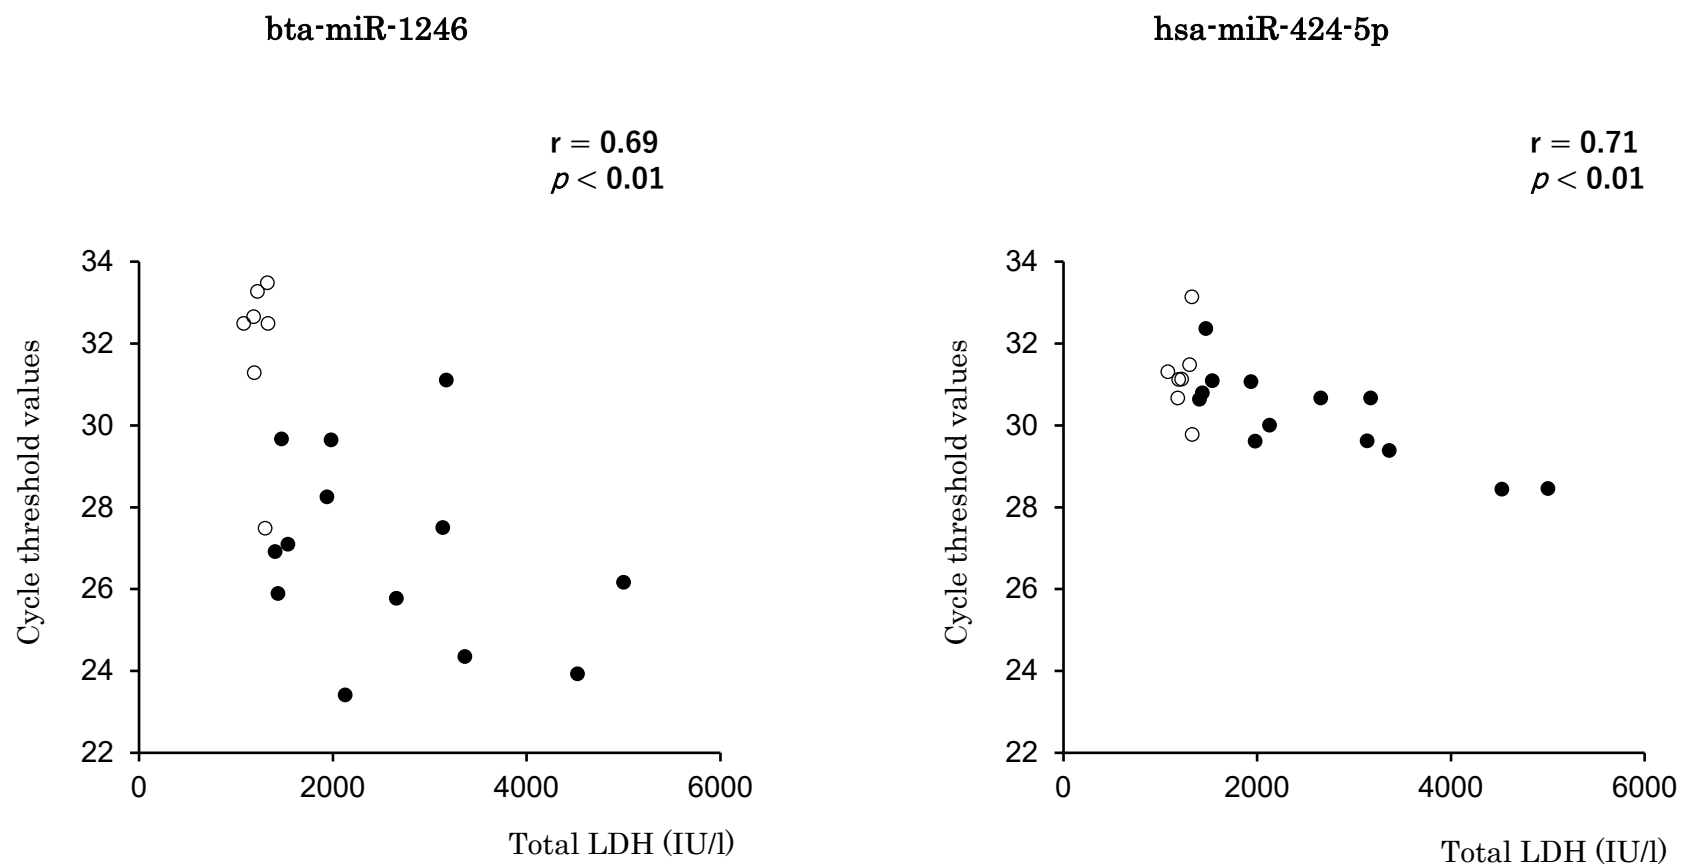

**Figure S6. Correlation between total lactose dehydrogenase (LDH) activity and cycle threshold values of miRNAs for biomarker candidates using milk small extracellular vesicles.** The correlation between two continuous variables was determined using Spearman's bivariate correlation analysis.

○ Uninfected cattle (n = 7)  
● EBL cattle (n = 13)

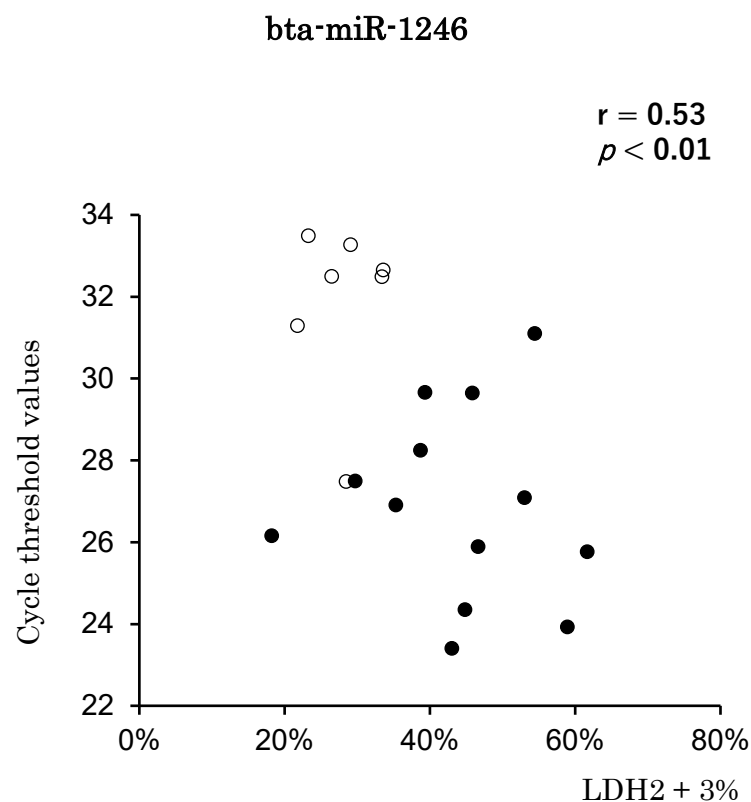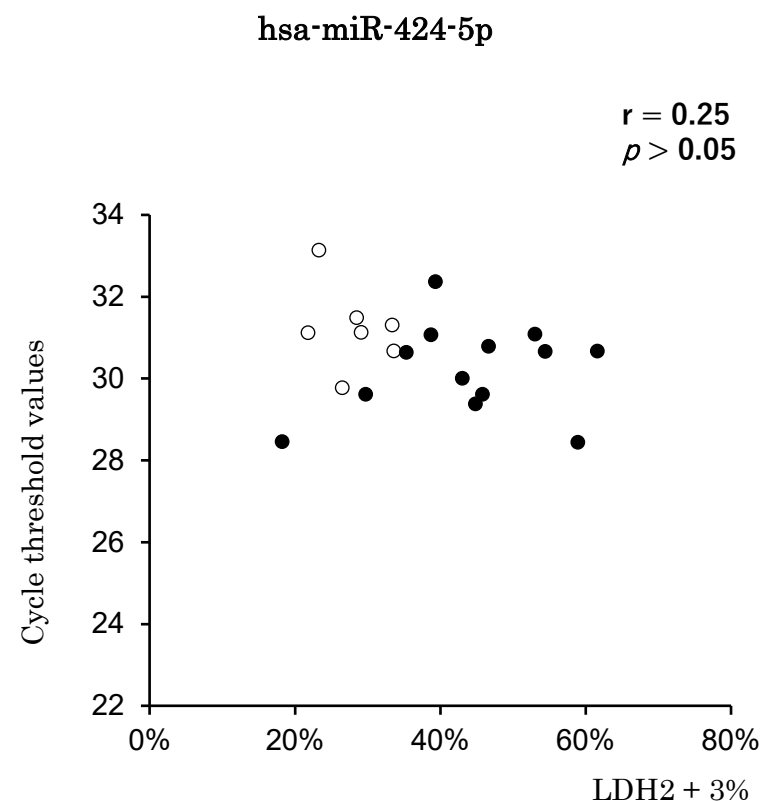

**Figure S7. Correlation between lactose dehydrogenase (LDH) isozymes 2 + 3 and cycle threshold values of miRNAs for biomarker candidates using milk small extracellular vesicles.** The correlation between two continuous variables was determined using Spearman's bivariate correlation analysis.

○ Uninfected cattle (n = 7)

● EBL cattle (n = 13)



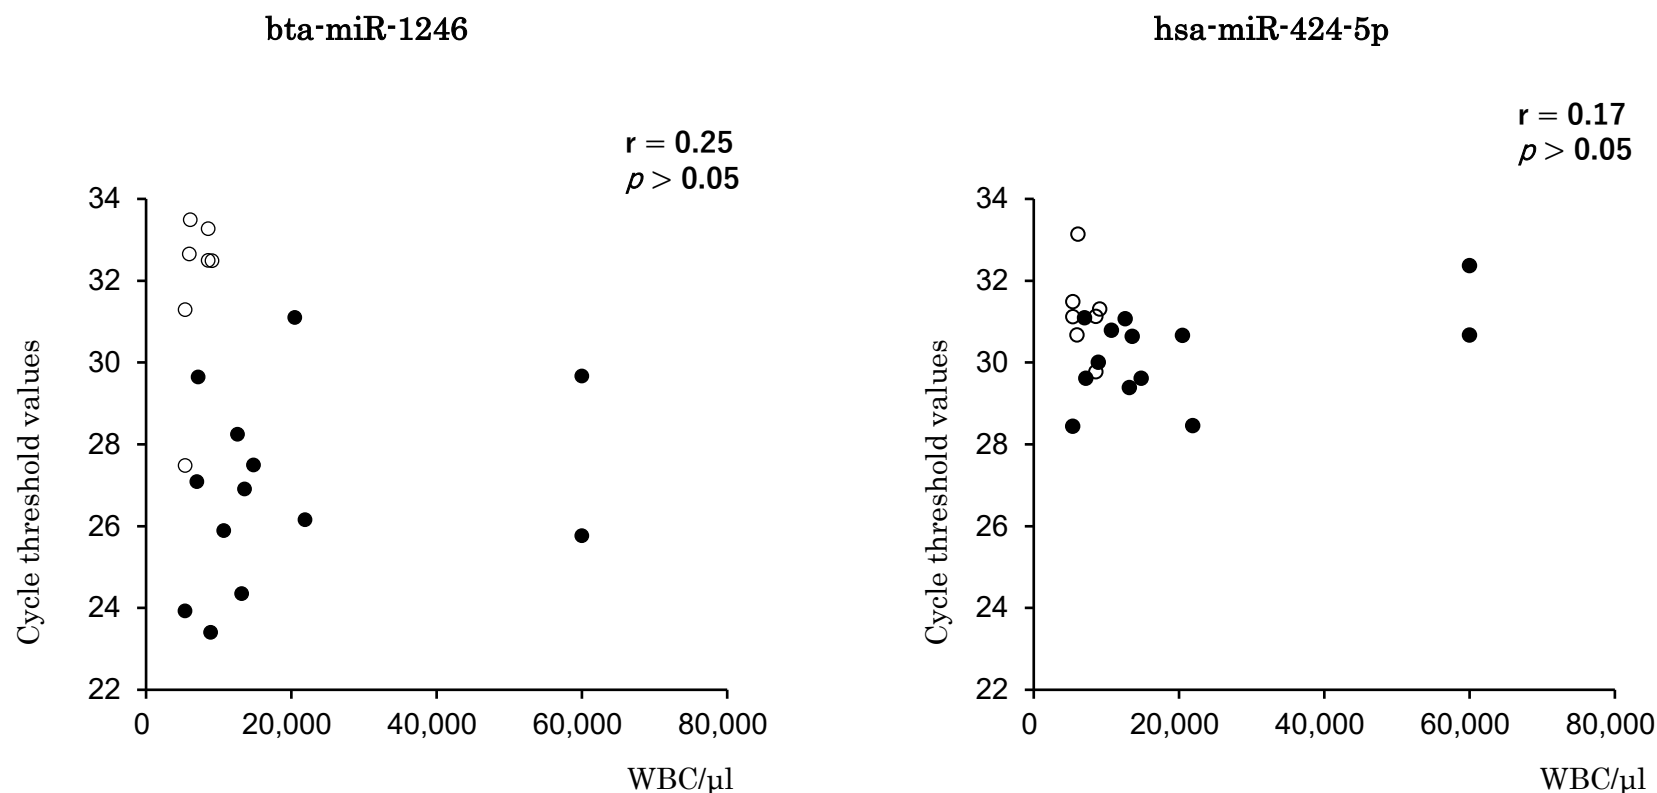

**Figure S8. Correlation between white blood cell (WBC) counts and cycle threshold values of miRNAs for biomarker candidates using milk small extracellular vesicles.** The correlation between two continuous variables was determined using Spearman's bivariate correlation analysis.

○ Uninfected cattle (n = 7)

● EBL cattle (n = 13)

bta-miR-1246

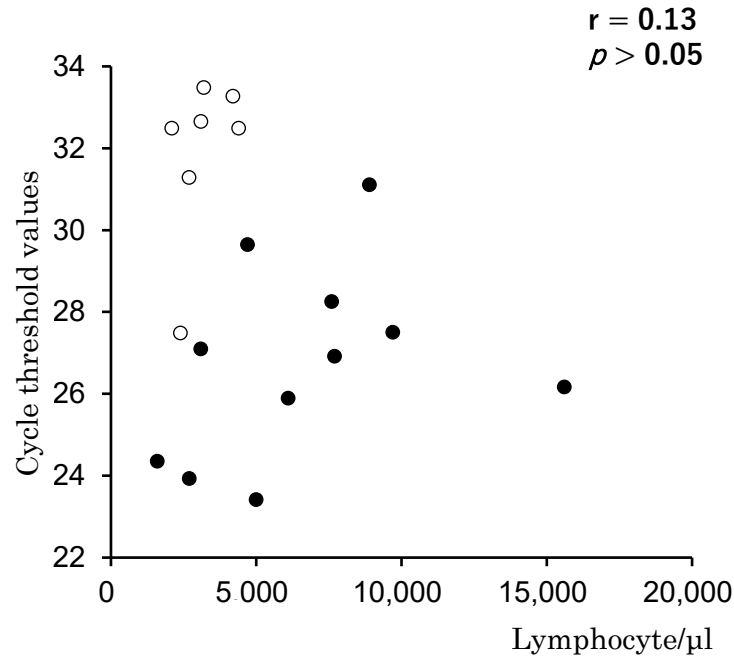

hsa-miR-424-5p

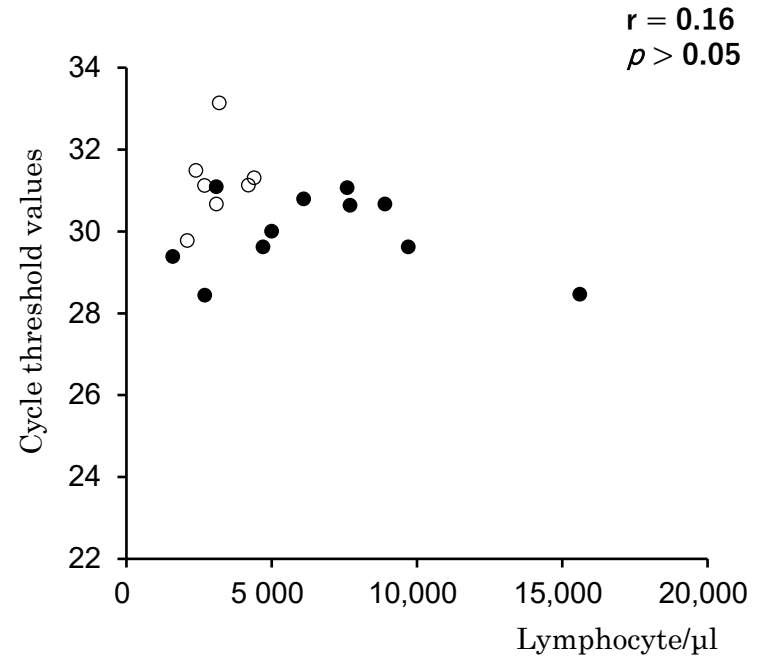

**Figure S9. Correlation between lymphocyte counts and cycle threshold values of miRNAs for biomarker candidates using milk small extracellular vesicles.** The correlation between two continuous variables was determined using Spearman's bivariate correlation analysis.

○ Uninfected cattle (n = 7)

● EBL cattle (n = 11)
